# Supplementary material for: Sn regulates the electronic structure and metal particles of Pd to improve the hydrogenation performance of 4-nitrophenol
Source: Royal Society of Chemistry journal article supplement (doi:10.1039/d2nj05292j), 2023-01-01
Supplement: d2nj05292j1.pdf [file d2nj05292j1.pdf]

## Supporting Information

### **Sn regulates the electronic structure and metal particles of Pd to improve the hydrogenation performance of 4-nitrophenol**

Lele Yan, Yuyao Wang, Lina Zhu, Junjie Chen, Yuyang Xu, Zijian Wang, Tongyang Song, Bo Zhao, Xianlang Chen \* and Rongrong Li \*

Engineering Research Center of Recycling & Comprehensive Utilization of Pharmaceutical and Chemical Waste of Zhejiang Province, Taizhou University, Taizhou, Zhejiang, P. R. China

\*Corresponding author: E-mail: chenxianlangaini@163.com; lrr@tzc.edu.cn.

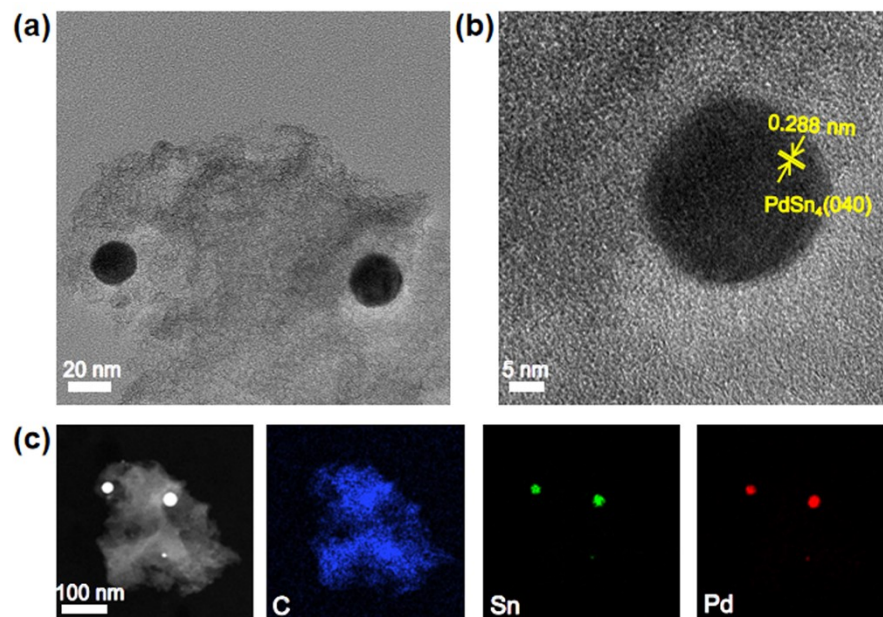

Fig. S1 (a, b) The HR-TEM and (c) TEM Elemental mapping image of PdSn<sub>4</sub>/C

Table S1. XPS analysis for PdSn/C, PdSn<sub>2</sub>/C, PdSn<sub>4</sub>/C and used-PdSn<sub>4</sub>/C catalysts.

| Samples                   | Pd (at %) | Sn (at %) |
|---------------------------|-----------|-----------|
| PdSn/C                    | 0.64      | 0.54      |
| PdSn <sub>2</sub> /C      | 0.60      | 1.10      |
| PdSn <sub>4</sub> /C      | 0.58      | 2.08      |
| used-PdSn <sub>4</sub> /C | 0.56      | 2.05      |

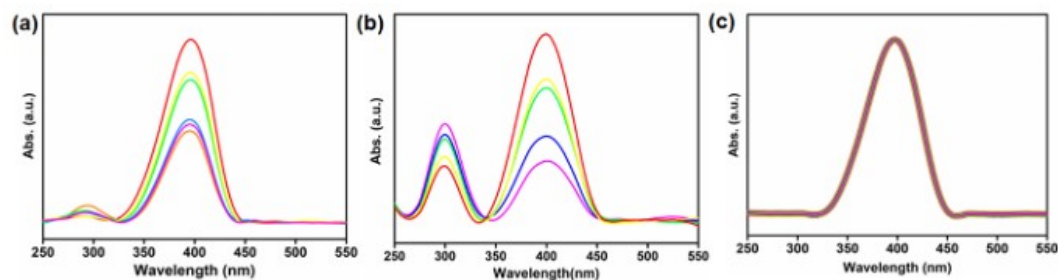

Fig. S2 Ultraviolet visible absorption diagram of p-nitrophenol catalytic hydrogenation reaction of (a) Sn/C, (b) PdSn<sub>6</sub>/C and (c) without catalyst.

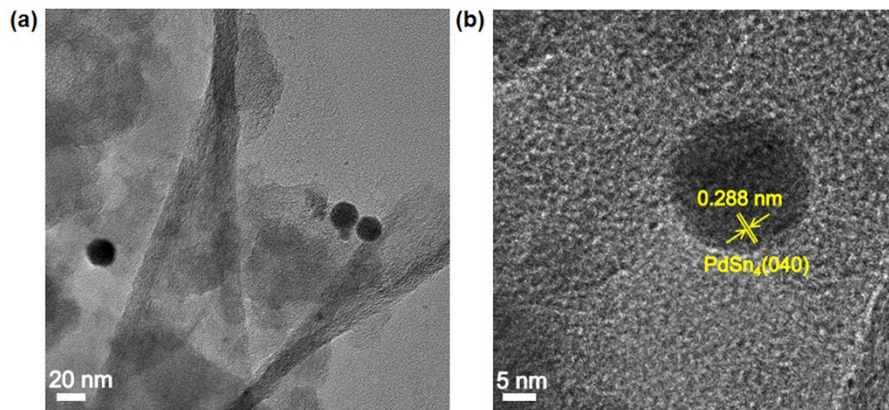

Fig. S3 (a, b)The HR-TEM image of used PdSn<sub>4</sub>/C catalyst for 6 run times
